# Supplementary material for: Challenges and opportunities for improvement in the management and financing system of Health Promotion Offices in Hungary
Source: Frontiers journal article supplement (doi:10.3389/fpubh.2023.1219186), 2023-10-27
Supplement: Table_1.pdf [file Table_1.pdf]

## Supplementary Material

### Challenges and opportunities for improvement in the management and financing system of Health Promotion Offices in Hungary

Krisztián Horváth, Gergő Turi, Csilla Kaposvári, Borbála Cseh, Csaba László Dózsa

**\* Correspondence:**

Krisztián Horváth

[horvath.krisztian@med.semmelweis-univ.hu](mailto:horvath.krisztian@med.semmelweis-univ.hu)

**1. Supplementary Figure S1 Percentage of HPO respondents according to the difficulty of finding staff for specific occupations (easy, difficult, very difficult).**

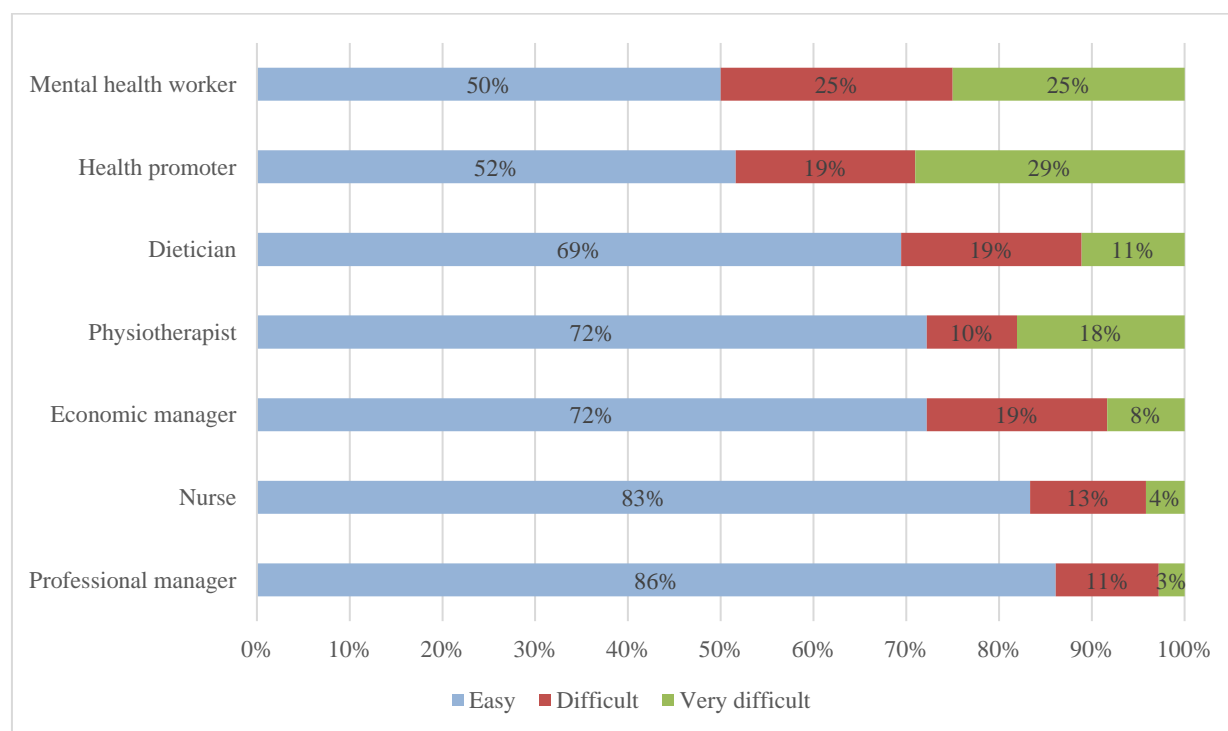

Source: Authors

## Supplementary Material

### 2. Supplementary Figure S2. Percentage of HPO respondents according to the difficulty of organizing specific health promotion programmes (easy, manageable, very difficult).

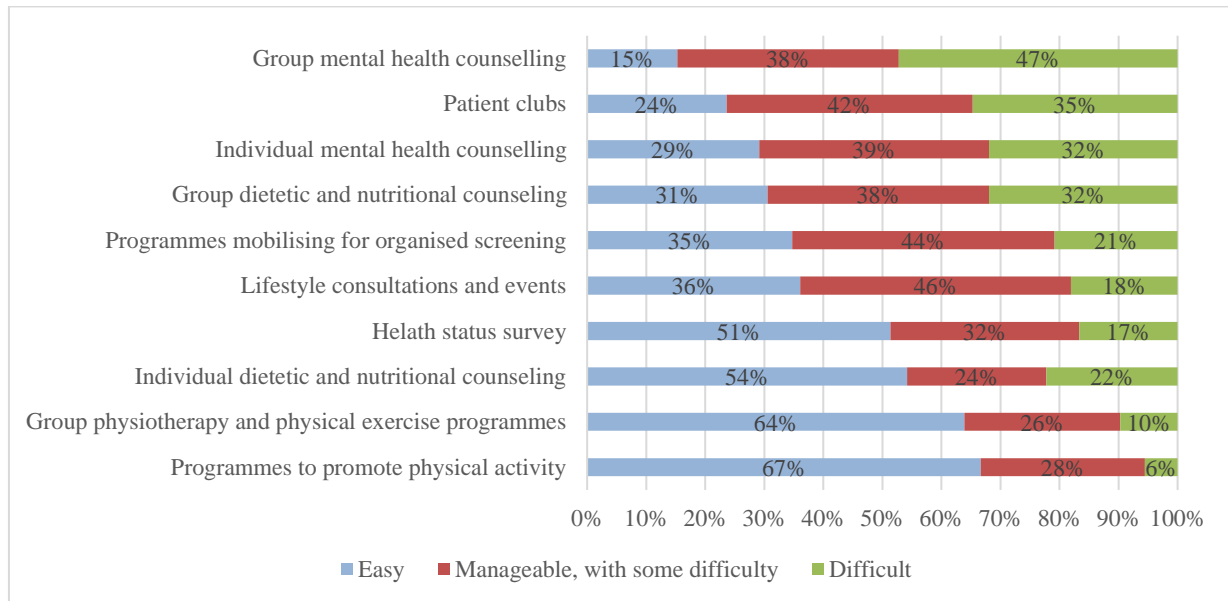

Source: Authors

### 3. Supplementary Figure S3. Percentage of communication platforms used by HPOs.

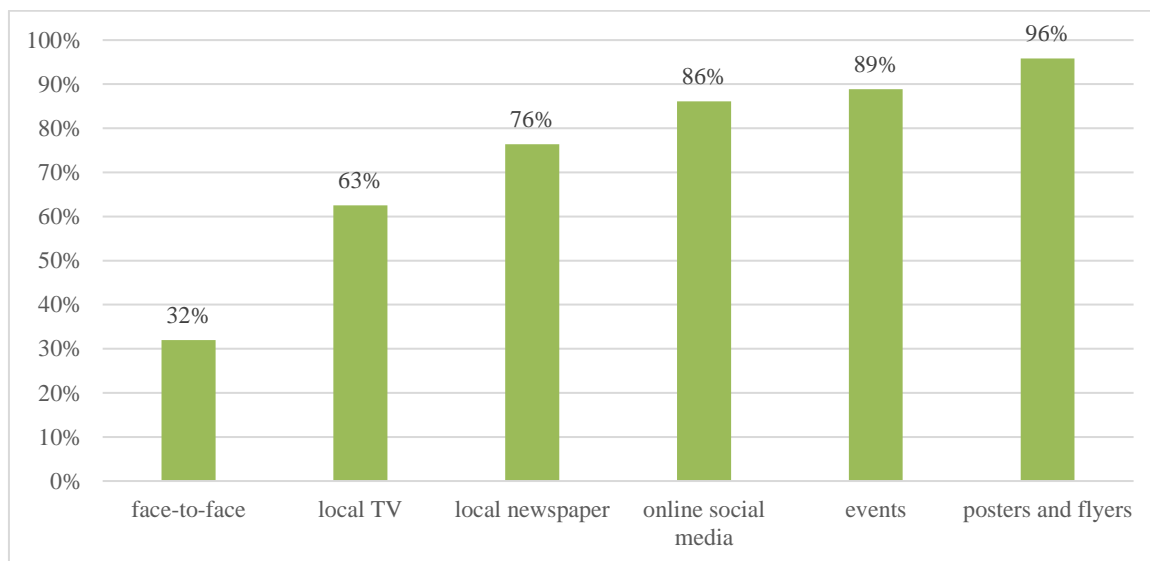

Source: Authors
